# Supplementary material for: Elderly Hepatocellular Carcinoma Patients: Open or Laparoscopic Approach?
Source: PubMed Central journal article supplement (PMC7466133; doi:10.3390/cancers12082281), 2020-08-14
Supplement: cancers-12-02281-s001.pdf [file cancers-12-02281-s001.pdf]

## Supplementary Materials:

**Supplement Table 1.** Risk factors for HCC recurrence in univariate analysis.

|                              | Before PS matching |              |         | After PS matching |              |         |
|------------------------------|--------------------|--------------|---------|-------------------|--------------|---------|
|                              | OR                 | 95% CI       | P-value | OR                | 95% CI       | P-value |
| Sex (female)                 | 0.959              | 0.535-1.720  | 0.889   | 1.027             | 0.522-2.023  | 0.938   |
| Age >75 years                | 1.025              | 0.525-2.001  | 0.943   | 1.418             | 0.634-3.174  | 0.395   |
| Etiology (viral)             | 0.929              | 0.585-1.477  | 0.757   | 1.010             | 0.563-1.810  | 0.974   |
| Extent of resection (major)  | 0.840              | 0.528-1.336  | 0.461   | 0.676             | 0.371-1.230  | 0.200   |
| Complete encapsulation       | 0.768              | 0.277-2.128  | 0.612   | 0.573             | 0.201-1.637  | 0.299   |
| Microvascular invasion       | 1.439              | 0.883-2.344  | 0.144   | 1.187             | 0.662-2.129  | 0.564   |
| Portal vein tumor thrombosis | 3.586              | 1.546-8.318  | 0.003   | 3.436             | 1.056-11.185 | 0.040   |
| Intrahepatic metastasis      | 4.644              | 1.861-11.585 | 0.001   | 2.363             | 0.531-9.773  | 0.235   |
| Cirrhosis                    | 1.417              | 0.888-2.260  | 0.144   | 1.435             | 0.803-2.563  | 0.222   |
| LLR                          | 0.693              | 0.410-1.171  | 0.171   | 0.800             | 0.442-1.448  | 0.460   |
| Complication                 | 1.237              | 0.677-2.260  | 0.489   | 1.553             | 0.694-3.476  | 0.284   |
| Tumor grade 3 or 4           | 1.061              | 0.509-2.214  | 0.874   | 1.355             | 0.534-3.436  | 0.522   |
| Tumor necrosis               | 1.596              | 1.002-2.525  | 0.049   | 1.357             | 0.751-2.455  | 0.312   |
| WBC                          | 0.896              | 0.775-1.035  | 0.136   | 0.835             | 0.690-1.010  | 0.063   |
| NLR                          | 2.695              | 1.540-4.714  | 0.001   | 1.981             | 0.865-4.534  | 0.106   |
| Hemoglobin                   | 1.072              | 0.927-1.240  | 0.349   | 0.977             | 0.812-1.175  | 0.806   |
| Platelet                     | 0.995              | 0.991-0.999  | 0.008   | 0.994             | 0.989-0.999  | 0.012   |
| Total bilirubin              | 0.985              | 0.908-1.067  | 0.706   | 0.976             | 0.801-1.188  | 0.806   |
| AST                          | 1.009              | 1.001-1.017  | 0.023   | 1.010             | 1.000-1.021  | 0.060   |
| ALT                          | 1.006              | 1.001-1.011  | 0.027   | 1.005             | 0.998-1.012  | 0.180   |
| ALP                          | 1.003              | 0.997-1.010  | 0.313   | 1.004             | 0.996-1.012  | 0.305   |
| Albumin                      | 0.601              | 0.329-1.098  | 0.098   | 0.241             | 0.112-0.518  | <0.001  |
| Creatinine                   | 0.826              | 0.394-1.731  | 0.612   | 0.517             | 0.155-1.732  | 0.285   |
| CRP                          | 0.798              | 0.560-1.137  | 0.211   | 0.835             | 0.521-1.339  | 0.454   |
| AFP >40                      | 1.031              | 0.620-1.714  | 0.907   | 1.116             | 0.595-2.092  | 0.732   |
| PIVKA-II >70                 | 1.527              | 0.948-2.459  | 0.082   | 1.191             | 0.642-2.210  | 0.579   |
| Tumor size                   | 1.036              | 0.966-1.111  | 0.323   | 0.961             | 0.830-1.112  | 0.592   |
| ICG-R15                      | 1.057              | 1.022-1.094  | 0.001   | 1.073             | 1.036-1.111  | <0.001  |
| Free resection margin (mm)   | 0.998              | 0.979-1.016  | 0.809   | 0.996             | 0.973-1.018  | 0.699   |

|                                  |       |             |       |       |              |       |
|----------------------------------|-------|-------------|-------|-------|--------------|-------|
| Operation time                   | 1.000 | 0.998-1.002 | 0.958 | 1.000 | 0.997-1.003  | 0.954 |
| Blood loss during operation      | 1.000 | 0.999-1.000 | 0.487 | 1.000 | 0.999-1.001  | 0.705 |
| RBC transfusion during operation | 0.902 | 0.329-2.475 | 0.842 | 5.555 | 1.710-18.051 | 0.004 |
| Hospitalization                  | 1.005 | 0.986-1.025 | 0.593 | 1.010 | 0.991-1.029  | 0.327 |

\* PS, propensity score; OR, odds ratio; 95% CI, 95% confidence interval; LLR, laparoscopic liver resection; WBC, white blood cell; NLR, neutrophil-lymphocyte ratio; AST, aspartate transaminase; ALT, alanine transaminase; ALP, alkaline phosphatase; CRP, C-reactive protein; AFP, alpha-fetoprotein; PIVKA-II, prothrombin in vitamin K absence-II; ICG-R15, indocyanine green clearance at 15 minutes

**Supplement Table 2.** Risk factors for mortality in univariate analysis.

|                              | Before PS matching |                 |         | After PS matching |                  |         |
|------------------------------|--------------------|-----------------|---------|-------------------|------------------|---------|
|                              | OR                 | 95% CI          | P-value | OR                | 95% CI           | P-value |
| Sex (female)                 | 1.118              | 0.415-3.011     | 0.826   | 1.579             | 0.539-4.623      | 0.405   |
| Age >75                      | 2.848              | 1.170-6.937     | 0.021   | 5.294             | 1.992-14.894     | 0.002   |
| Diabetes                     | 0.479              | 0.178-1.291     | 0.146   | 0.575             | 0.183-1.807      | 0.344   |
| Hypertension                 | 0.729              | 0.322-1.654     | 0.450   | 1.513             | 0.516-4.435      | 0.451   |
| Cerebrovascular accidents    | 0.048              | 0.000-11449.707 | 0.631   | 0.049             | 0.000-1454508711 | 0.806   |
| Pulmonary disease            | 2.763              | 0.814-9.371     | 0.103   | 2.198             | 0.492-9.816      | 0.302   |
| Etiology (viral)             | 0.984              | 0.434-2.232     | 0.968   | 0.686             | 0.248-1.897      | 0.468   |
| Extent of resection (major)  | 0.936              | 0.413-2.122     | 0.875   | 1.087             | 0.394-2.997      | 0.873   |
| Complete encapsulation       | 1.135              | 0.150-8.570     | 0.902   | 0.958             | 0.12107.588      | 0.968   |
| Microvascular invasion       | 4.703              | 1.394-15.872    | 0.013   | 4.044             | 1.134-14.417     | 0.031   |
| Portal vein tumor thrombosis | 4.739              | 1.397-16.071    | 0.013   | 2.595             | 0.339-19.845     | 0.358   |
| Intrahepatic metastasis      | 14.399             | 5.651-36.690    | <0.001  | 17.877            | 5.643-56.636     | <0.001  |
| Cirrhosis                    | 1.355              | 0.594-3.092     | 0.470   | 1.414             | 0.512-3.899      | 0.504   |
| LLR                          | 0.910              | 0.373-2.218     | 0.835   | 1.183             | 0.426-3.281      | 0.747   |
| Complication                 | 3.378              | 1.458-7.827     | 0.005   | 6.132             | 2.218-16.952     | <0.001  |
| Tumor grade 3 or 4           | 2.663              | 1.048-6.768     | 0.040   | 3.153             | 0.999-9.953      | 0.050   |
| Tumor necrosis               | 2.278              | 0.986-5.265     | 0.054   | 2.551             | 0.908-7.170      | 0.076   |
| WBC                          | 0.841              | 0.651-1.087     | 0.187   | 0.833             | 0.603-1.151      | 0.268   |
| NLR                          | 2.655              | 1.051-6.708     | 0.039   | 1.062             | 0.216-5.218      | 0.941   |
| Hemoglobin                   | 0.879              | 0.691-1.119     | 0.294   | 0.751             | 0.548-1.028      | 0.074   |
| Platelet                     | 0.999              | 0.994-1.005     | 0.786   | 1.002             | 0.997-1.007      | 0.524   |
| Total bilirubin              | 0.989              | 0.876-1.115     | 0.854   | 0.969             | 0.422-2.224      | 0.940   |
| AST                          | 1.007              | 0.994-1.021     | 0.296   | 1.008             | 0.991-1.026      | 0.365   |
| ALT                          | 1.001              | 0.990-1.013     | 0.811   | 1.001             | 0.988-1.015      | 0.838   |

|                             |       |              |        |        |              |        |
|-----------------------------|-------|--------------|--------|--------|--------------|--------|
| ALP                         | 1.009 | 1.001-1.017  | 0.035  | 1.010  | 1.002-1.018  | 0.018  |
| Albumin                     | 0.733 | 0.256-2.104  | 0.564  | 0.452  | 0.126-1.627  | 0.225  |
| Creatinine                  | 0.641 | 0.124-3.320  | 0.596  | 0.854  | 0.180-4.062  | 0.843  |
| CRP                         | 0.768 | 0.388-1.523  | 0.450  | 0.922  | 0.457-1.859  | 0.922  |
| AFP >40                     | 4.736 | 1.930-11.625 | 0.001  | 5.026  | 1.716-14.724 | 0.003  |
| PIVKA-II >70                | 2.414 | 1.012-5.762  | 0.047  | 2.740  | 0.990-7.584  | 0.052  |
| Tumor size                  | 1.133 | 1.028-1.249  | 0.012  | 1.244  | 1.072-1.444  | 0.004  |
| ICG-R15                     | 1.044 | 0.991-1.101  | 0.104  | 1.040  | 0.978-1.105  | 0.214  |
| Free resection margin       | 0.972 | 0.930-1.016  | 0.211  | 0.939  | 0.877-1.005  | 0.071  |
| Operation time              | 1.005 | 1.001-1.009  | 0.013  | 1.006  | 1.000-1.011  | 0.039  |
| Blood loss during operation | 1.000 | 1.000-1.001  | 0.167  | 1.001  | 1.000-1.002  | 0.018  |
| RBC transfusion during op.  | 3.374 | 1.144-9.950  | 0.028  | 12.232 | 3.352-44.636 | <0.001 |
| Hospitalization             | 1.028 | 1.017-1.038  | <0.001 | 1.030  | 1.018-1.043  | <0.001 |

\* PS, propensity score; OR, odds ratio; 95% CI, 95% confidence interval; LLR, laparoscopic liver resection; WBC, white blood cell; NLR, neutrophil-lymphocyte ratio; AST, aspartate transaminase; ALT, alanine transaminase; ALP, alkaline phosphatase; CRP, C-reactive protein; AFP, alpha-fetoprotein; PIVKA-II, prothrombin in vitamin K absence-II; ICG-R15, indocyanine green clearance at 15 minutes
